# Supplementary material
Source: PubMed Central journal article supplement (PMC2939003)

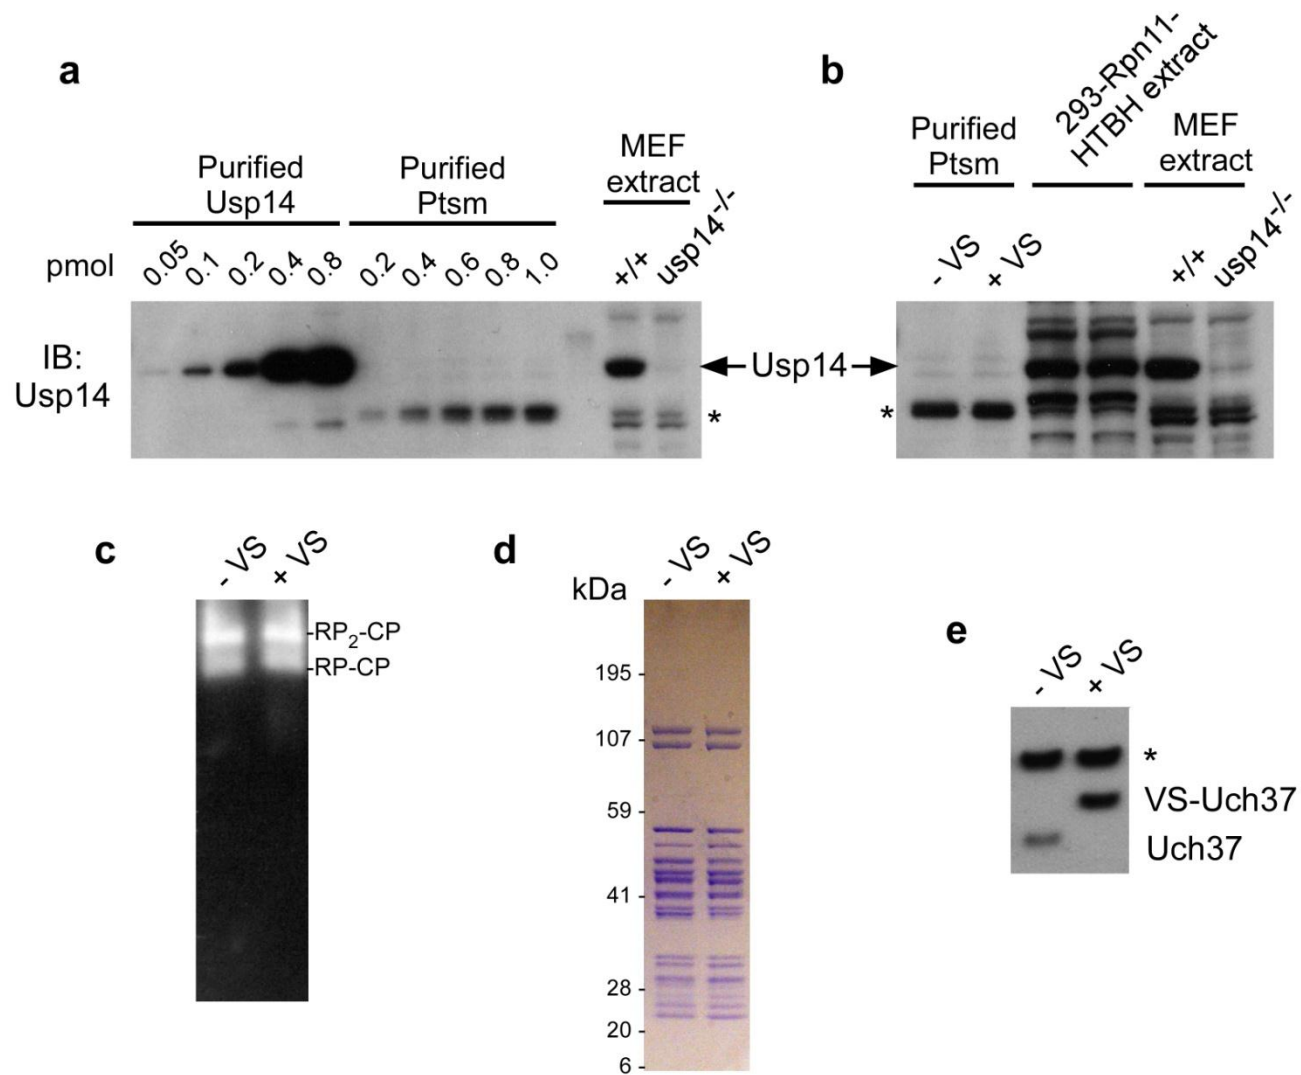

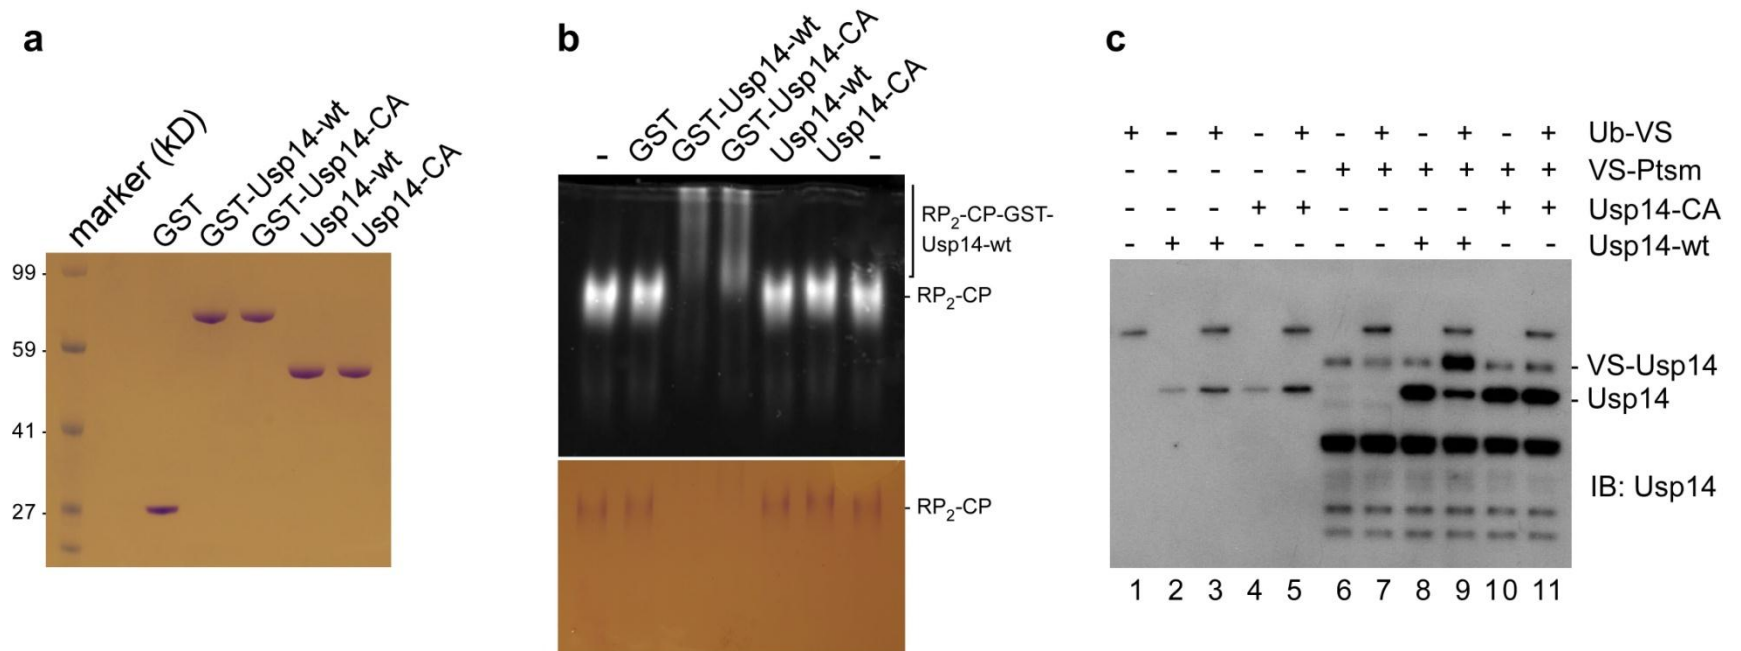

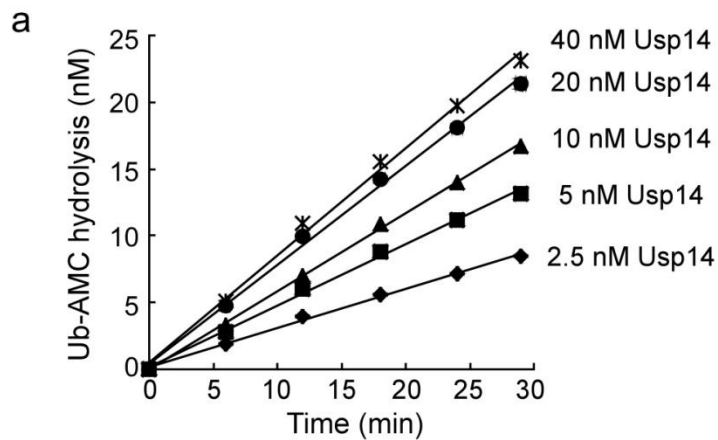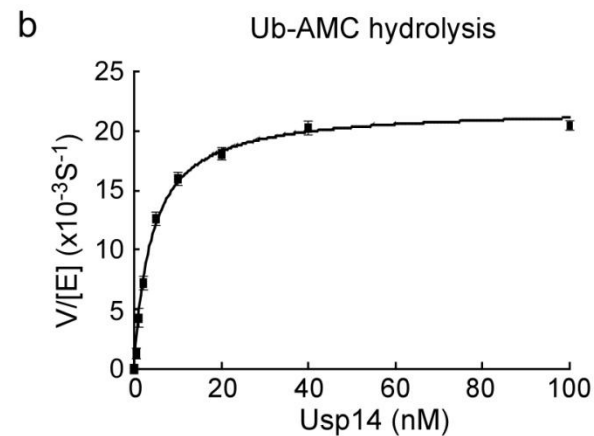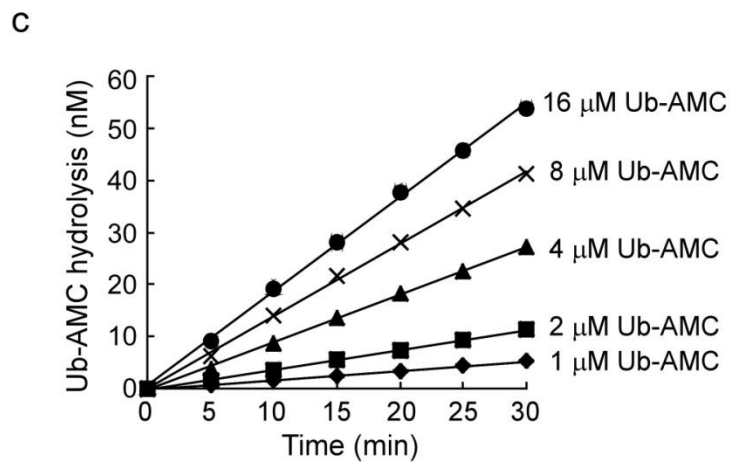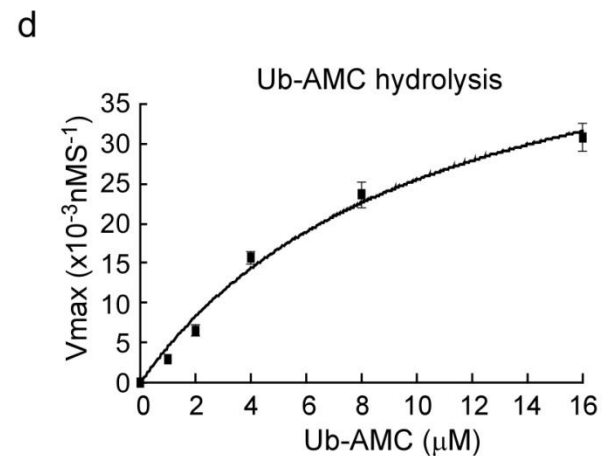

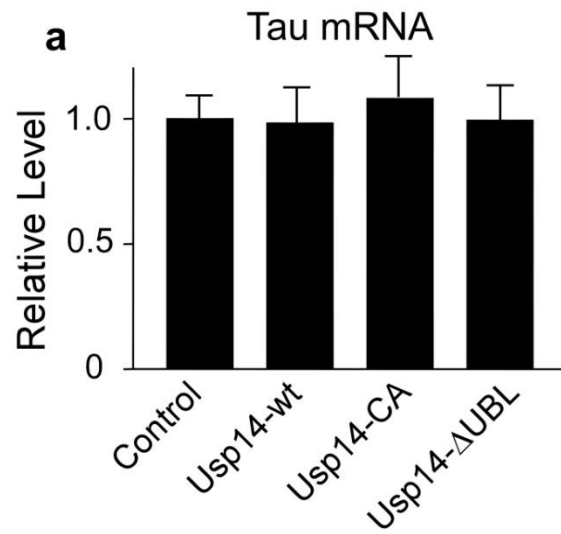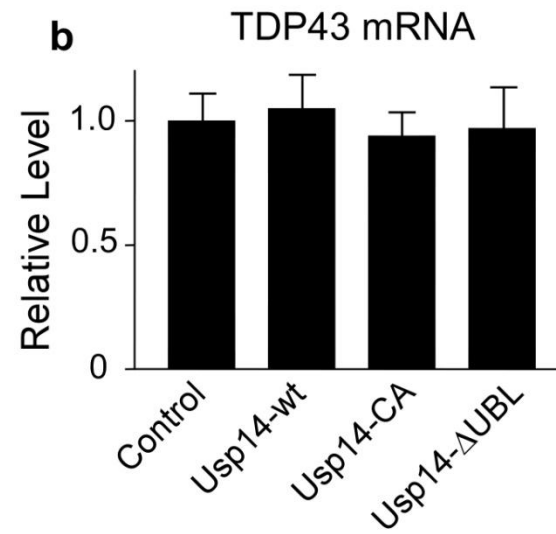

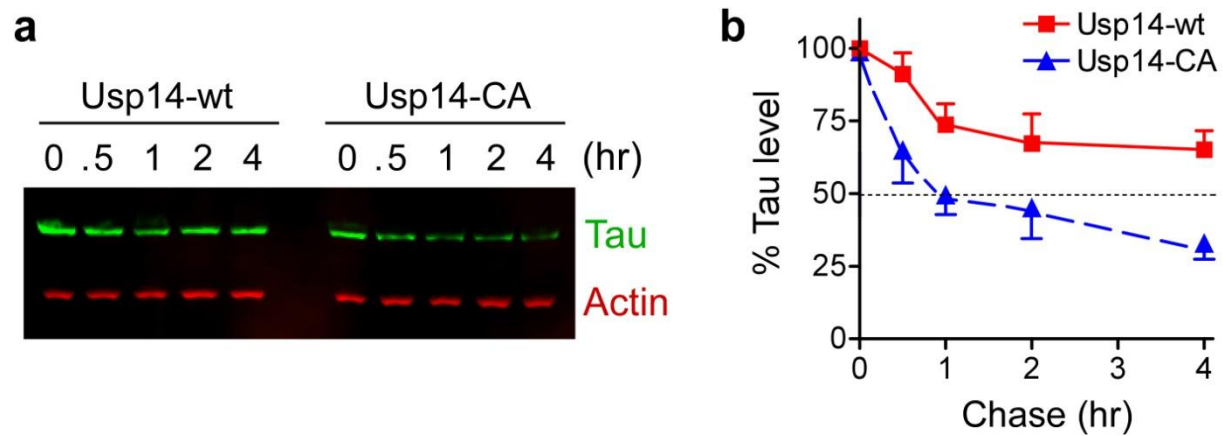

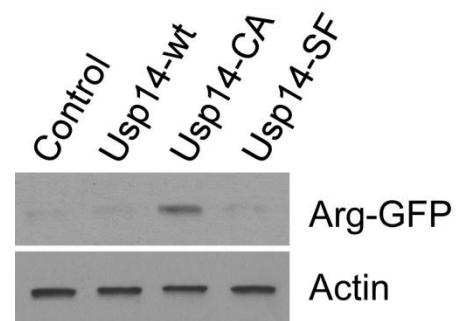

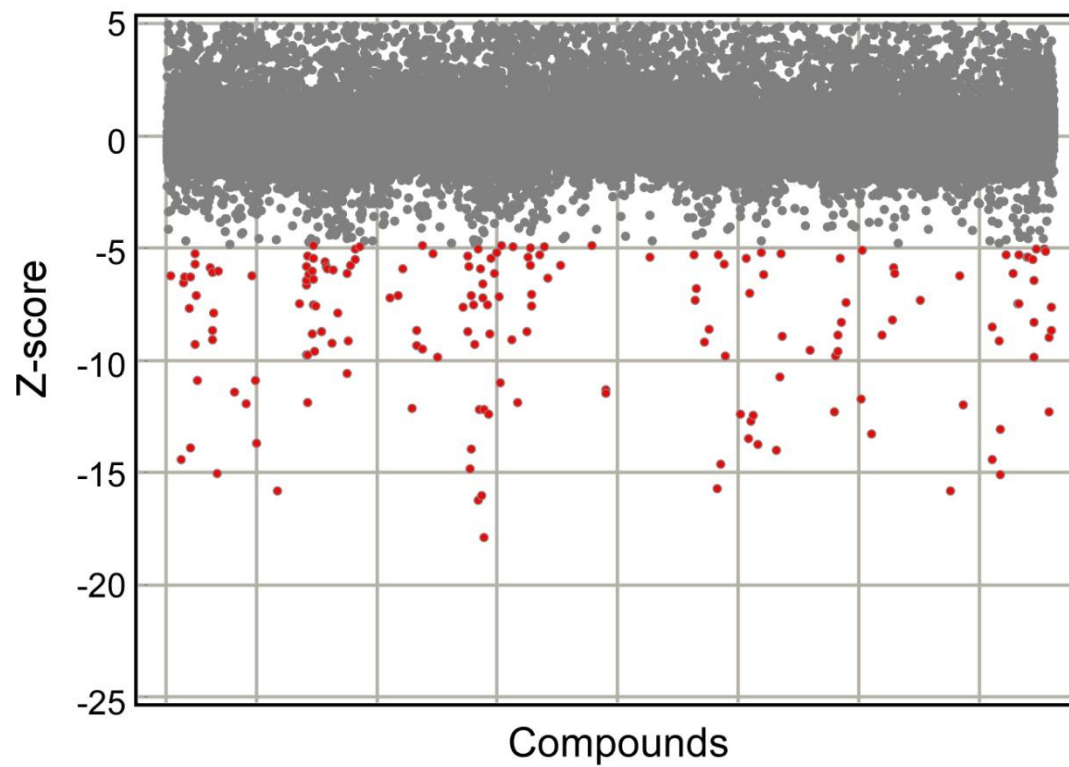

**a**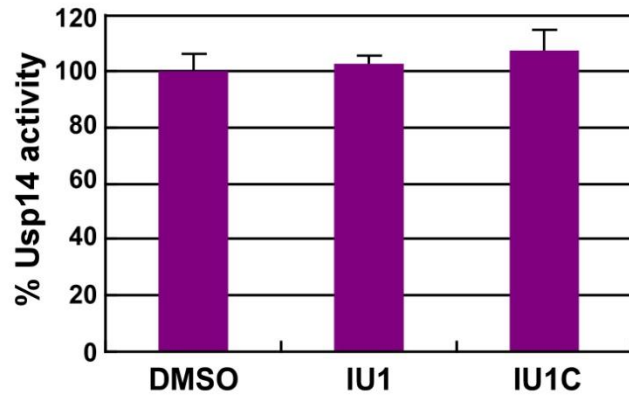**b**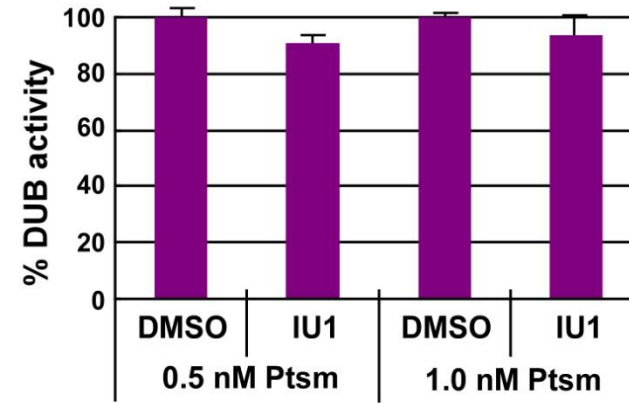**c**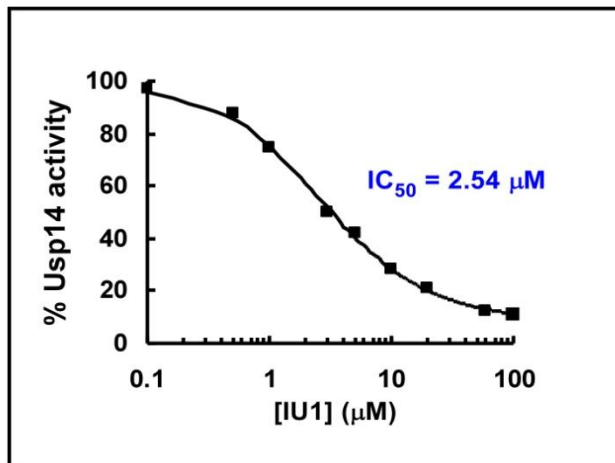**d**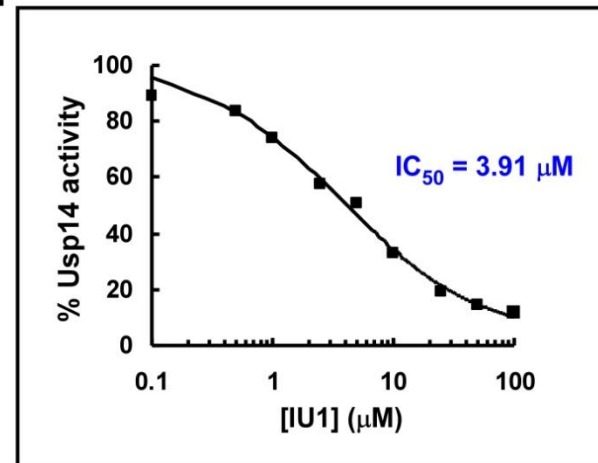



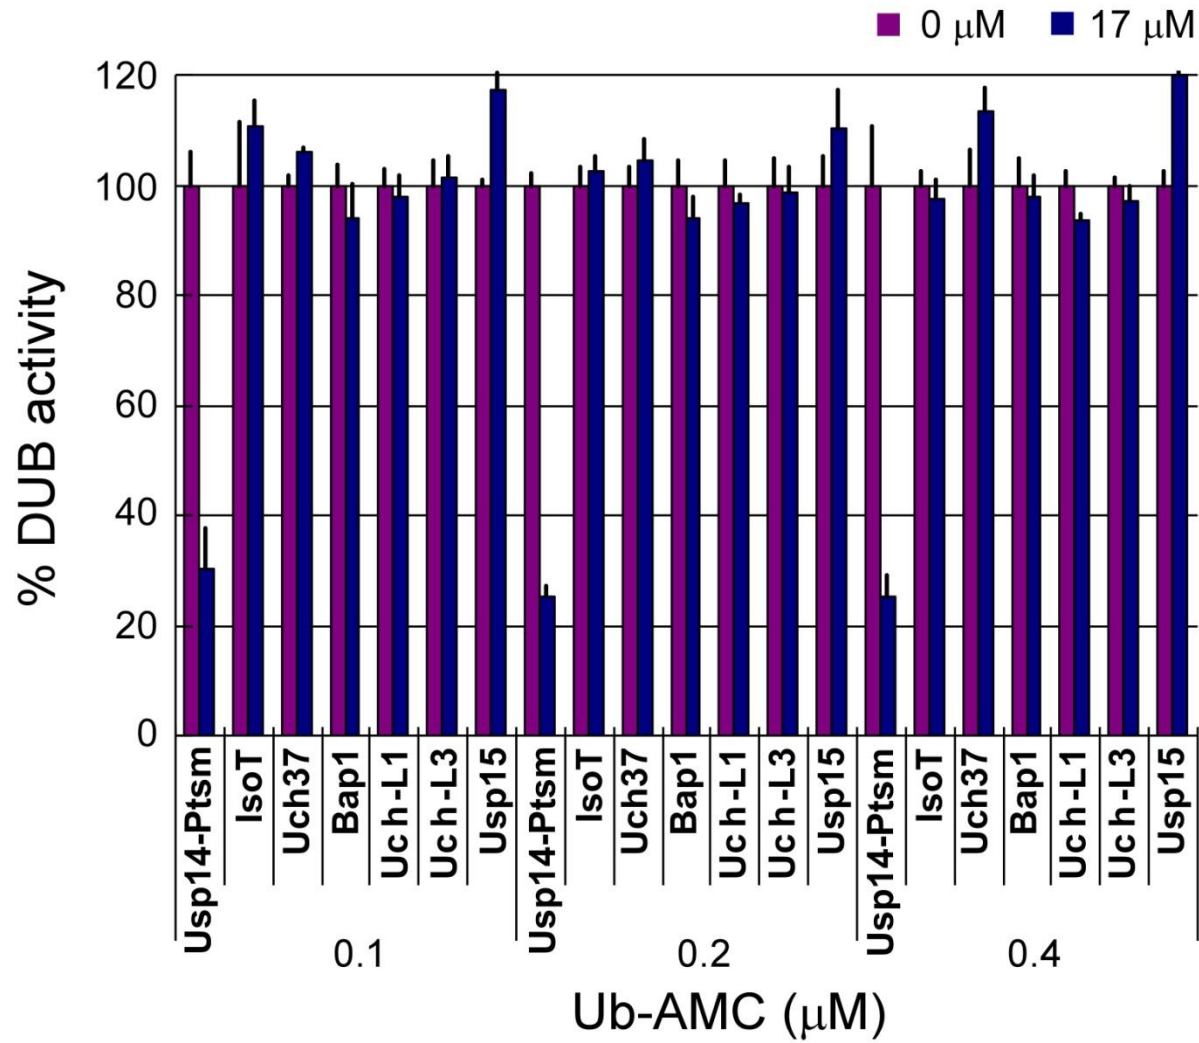

| <b>Enzyme</b> | <b>K<sub>M</sub> (μM)</b> | <b>Substrates</b> | <b>References for K<sub>M</sub></b>                |
|---------------|---------------------------|-------------------|----------------------------------------------------|
| Usp14-26S     | 11                        | Ub-AMC            | This study                                         |
| Bap1          | 7                         | Ub-AMC            | Personal communication, K. Wilkinson               |
| IsoT          | 1.4                       | Ub-AMC            | Dang et al (1998) Biochemistry, 37: 1868           |
| Uch37         | 12.7                      | Ub-AMC            | Yao et al (2006) Nat Cell Biol, 8: 994             |
| Uch-L1        | 0.041                     | Ub-AMC            | Liu et al (2003) Chem Biol, 10: 837                |
| Uch-L3        | 0.039                     | Ub-AMC            | Dang et al (1998) Biochemistry, 37: 1868           |
| Usp2 CD       | 0.554                     | Ub-AMC            | Hassiepen et al (2007) Anal Biochem, 371: 201      |
| Usp7 CD       | 44.2                      | Ub-AMC            | Fernandez-Montalvan et al (2007) FEBS J, 274: 4256 |
| Usp15         | 2.98                      | Ub-AMC            | This study                                         |

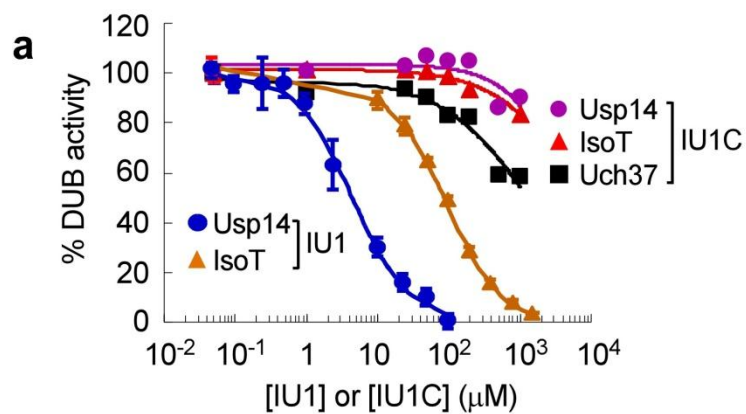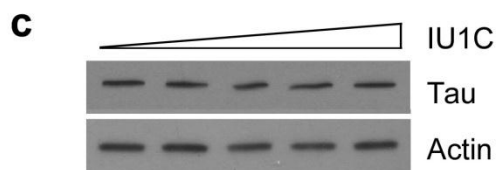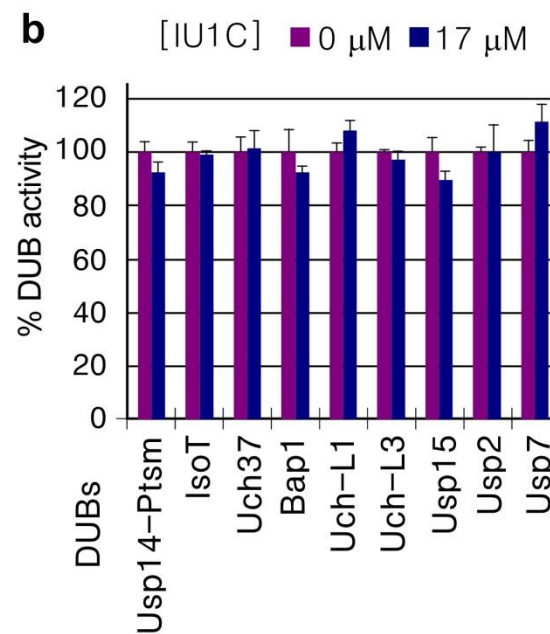

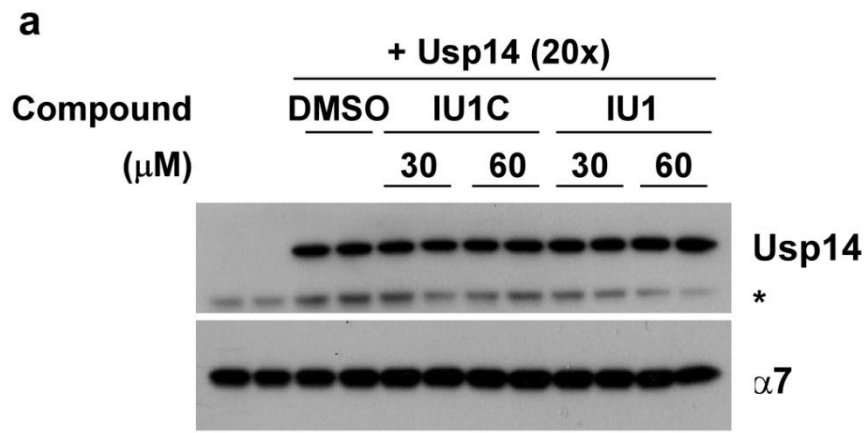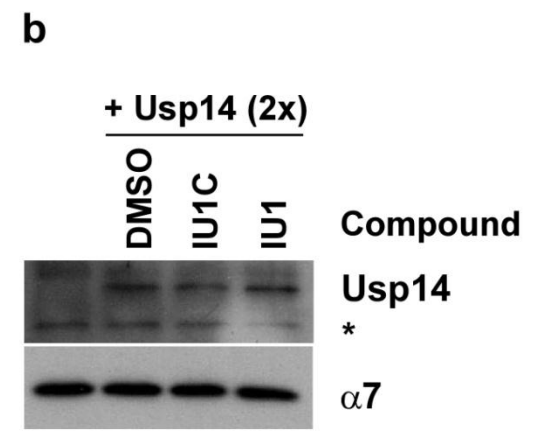

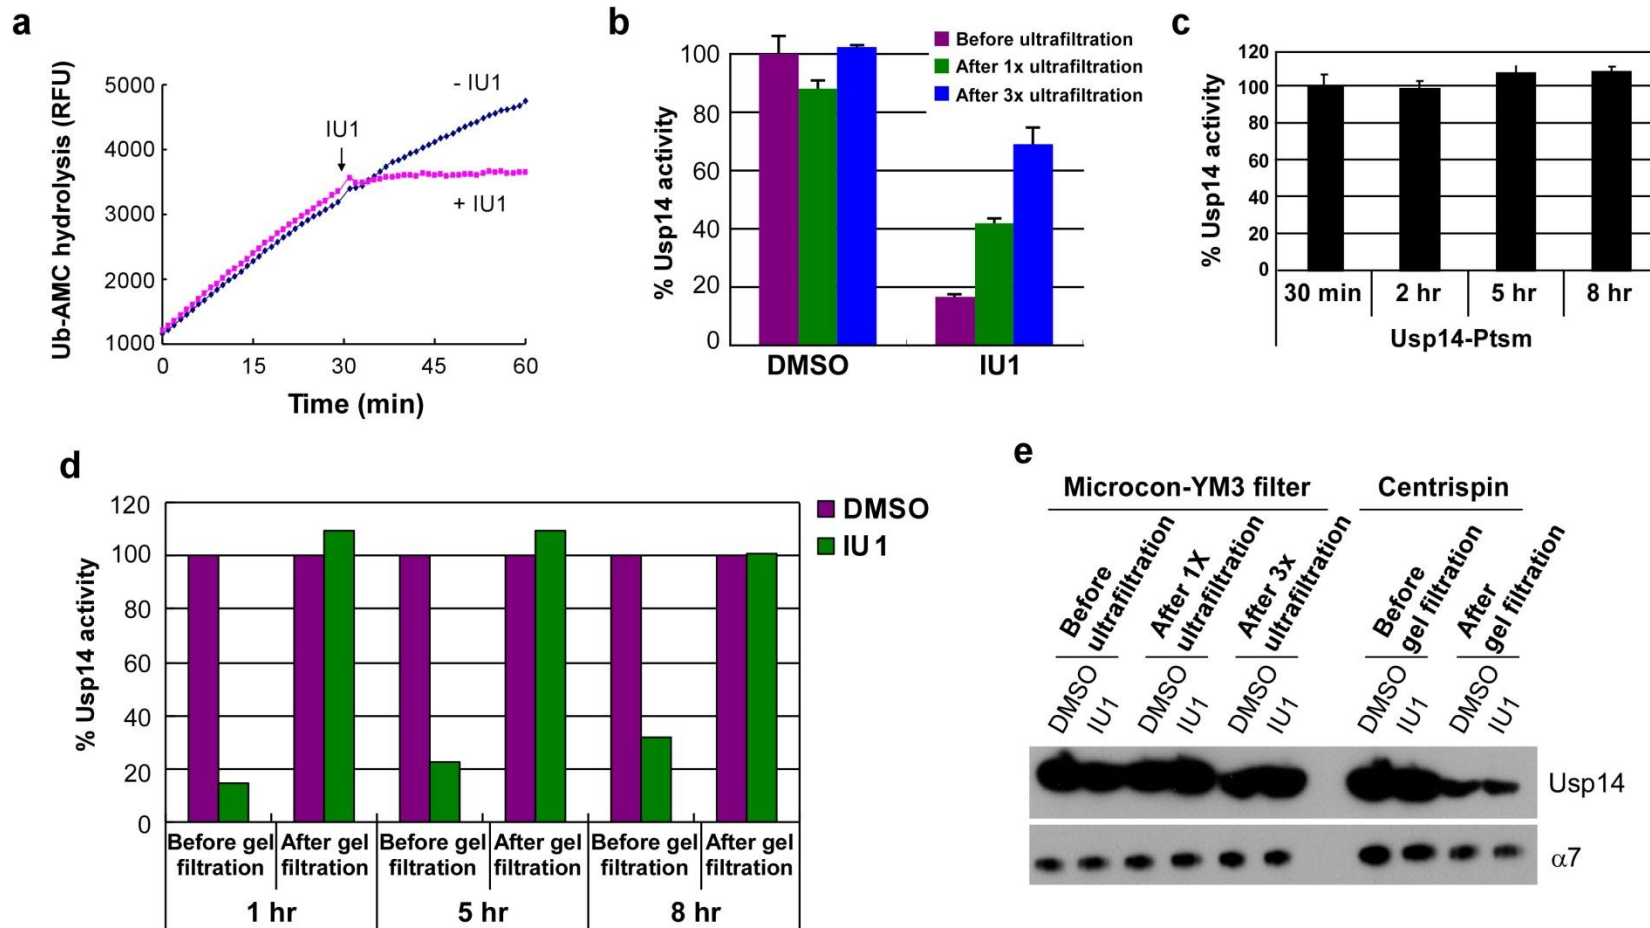

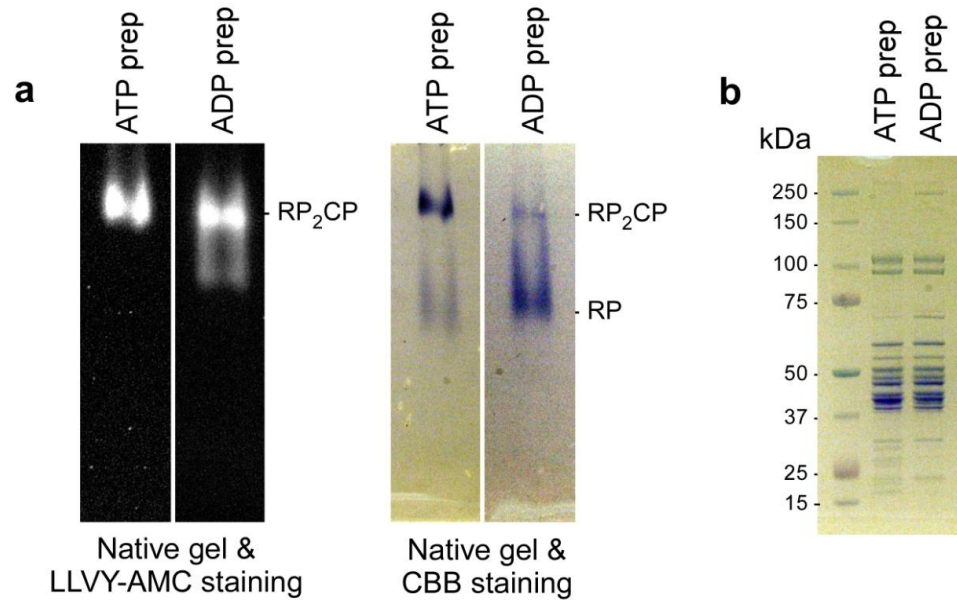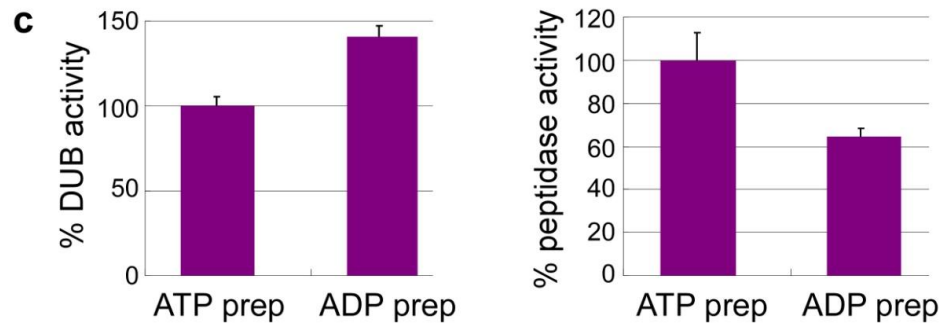

**d**

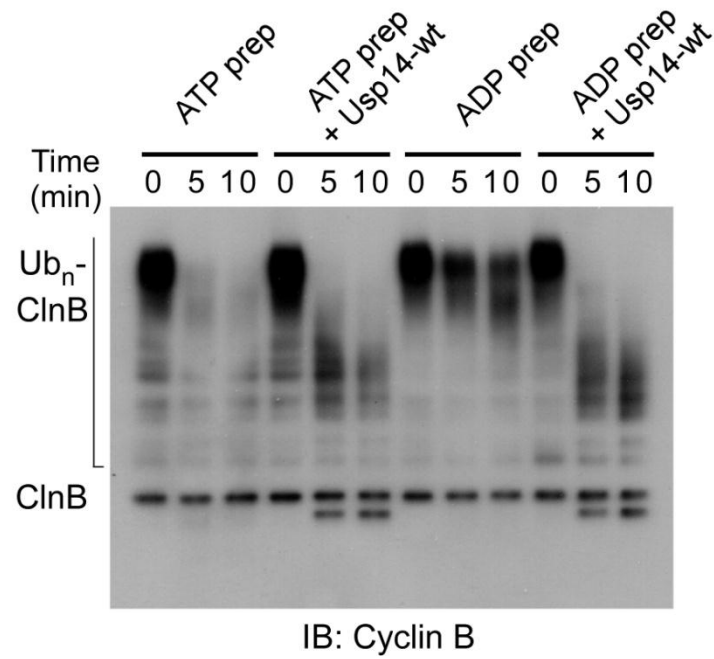

**e**

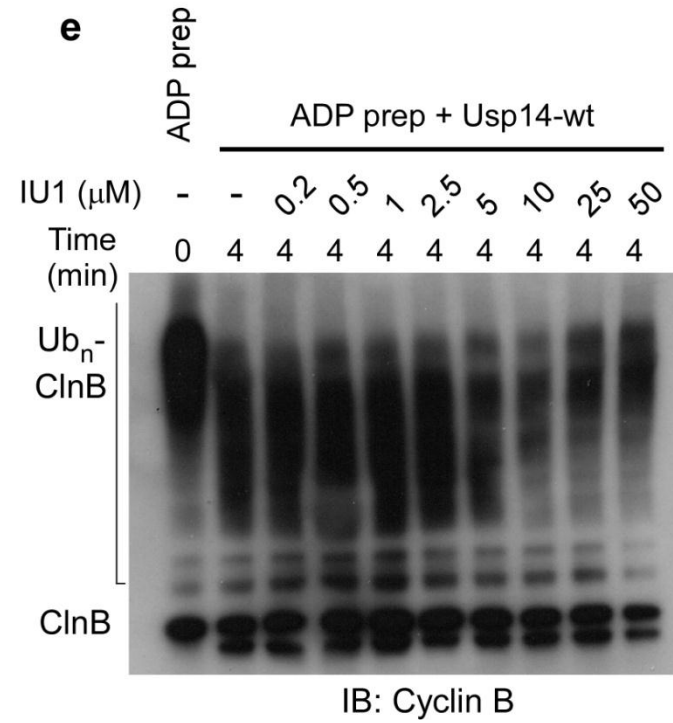





# Supplementary Fig. 16

**a**

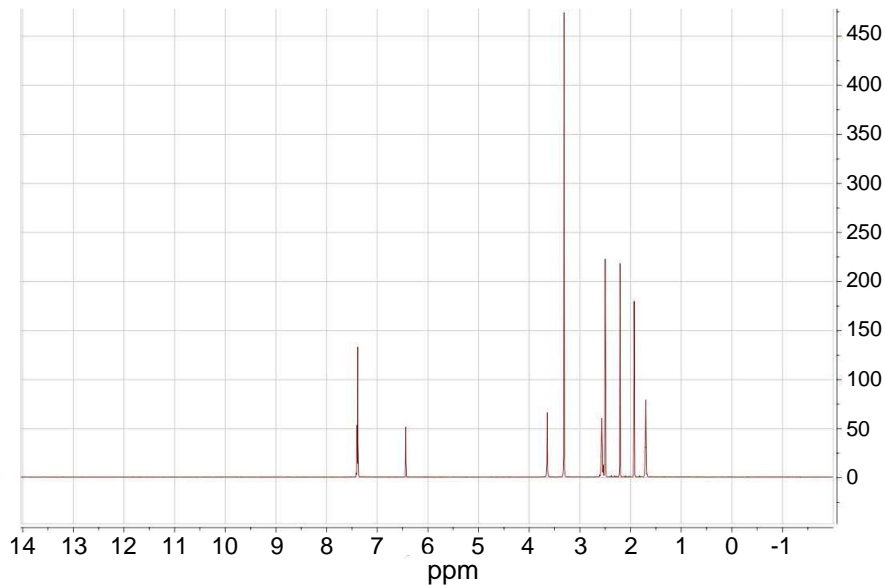

**b**

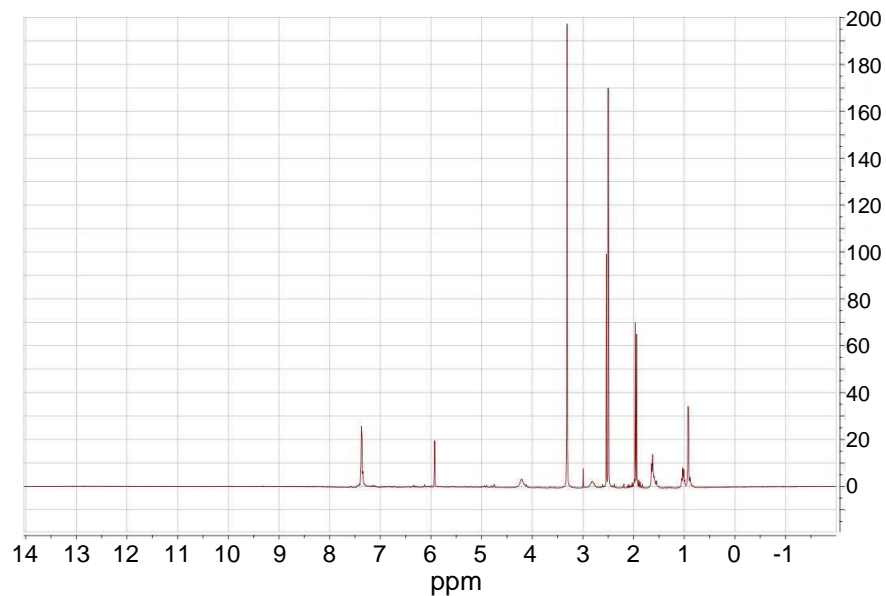

**c**

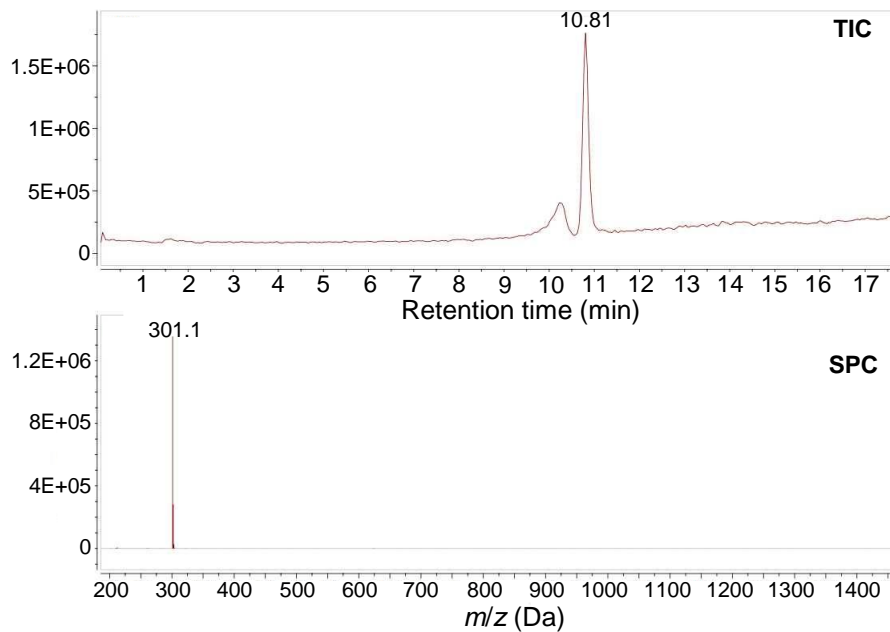

**d**

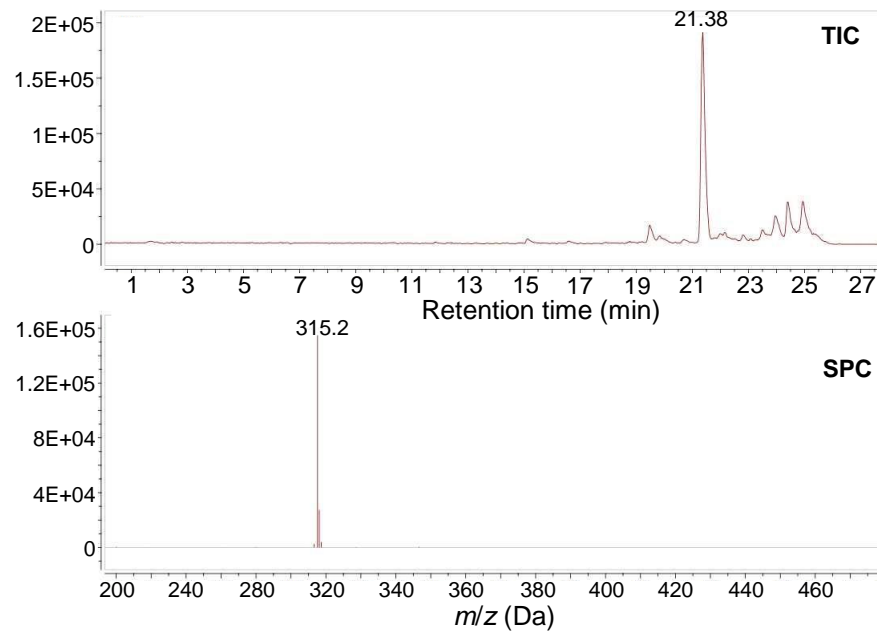

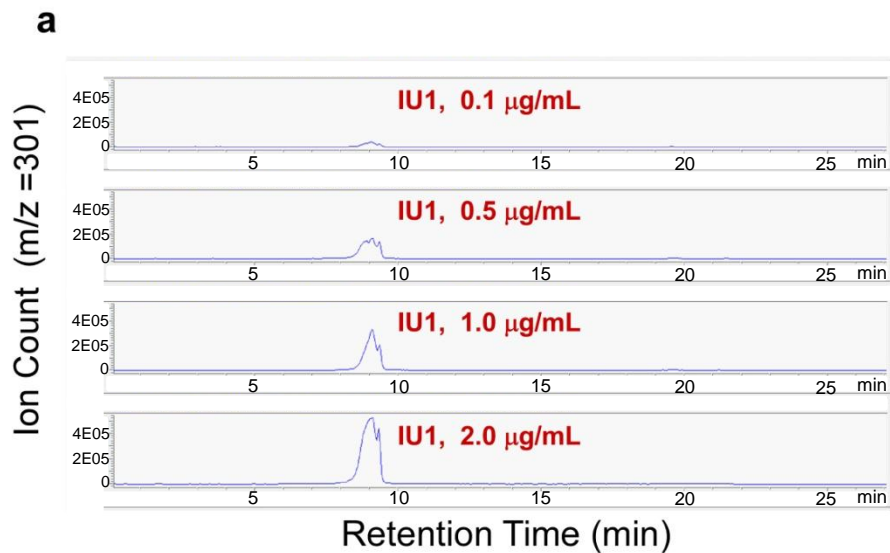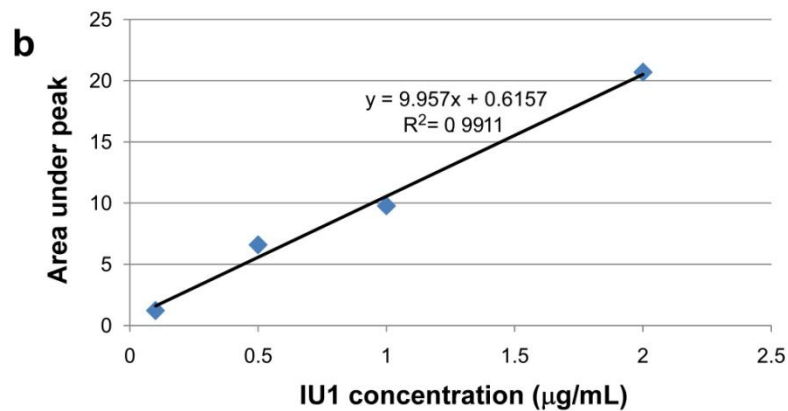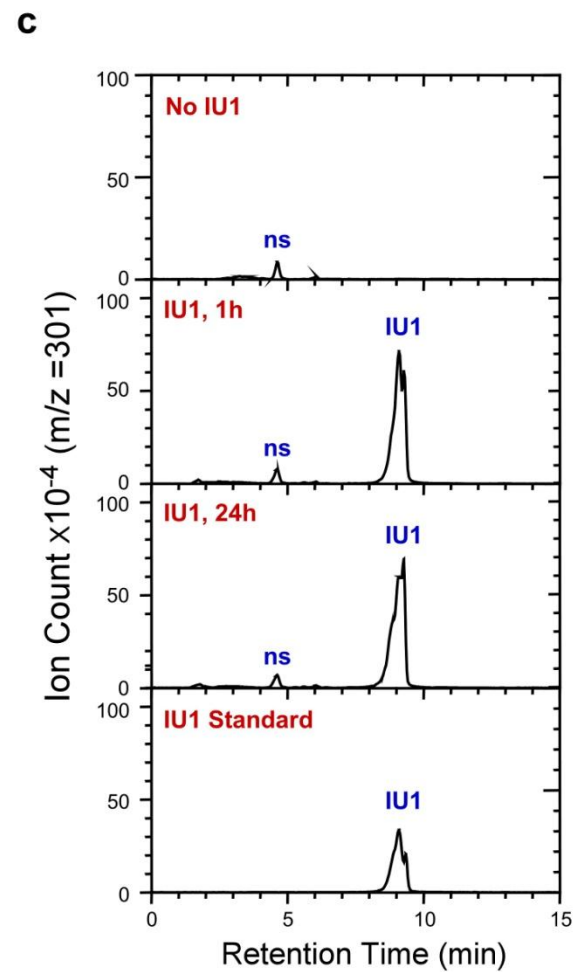

# Supplementary Fig. 18

**a**

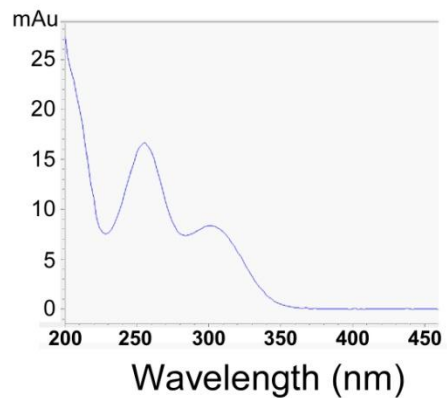

**b**

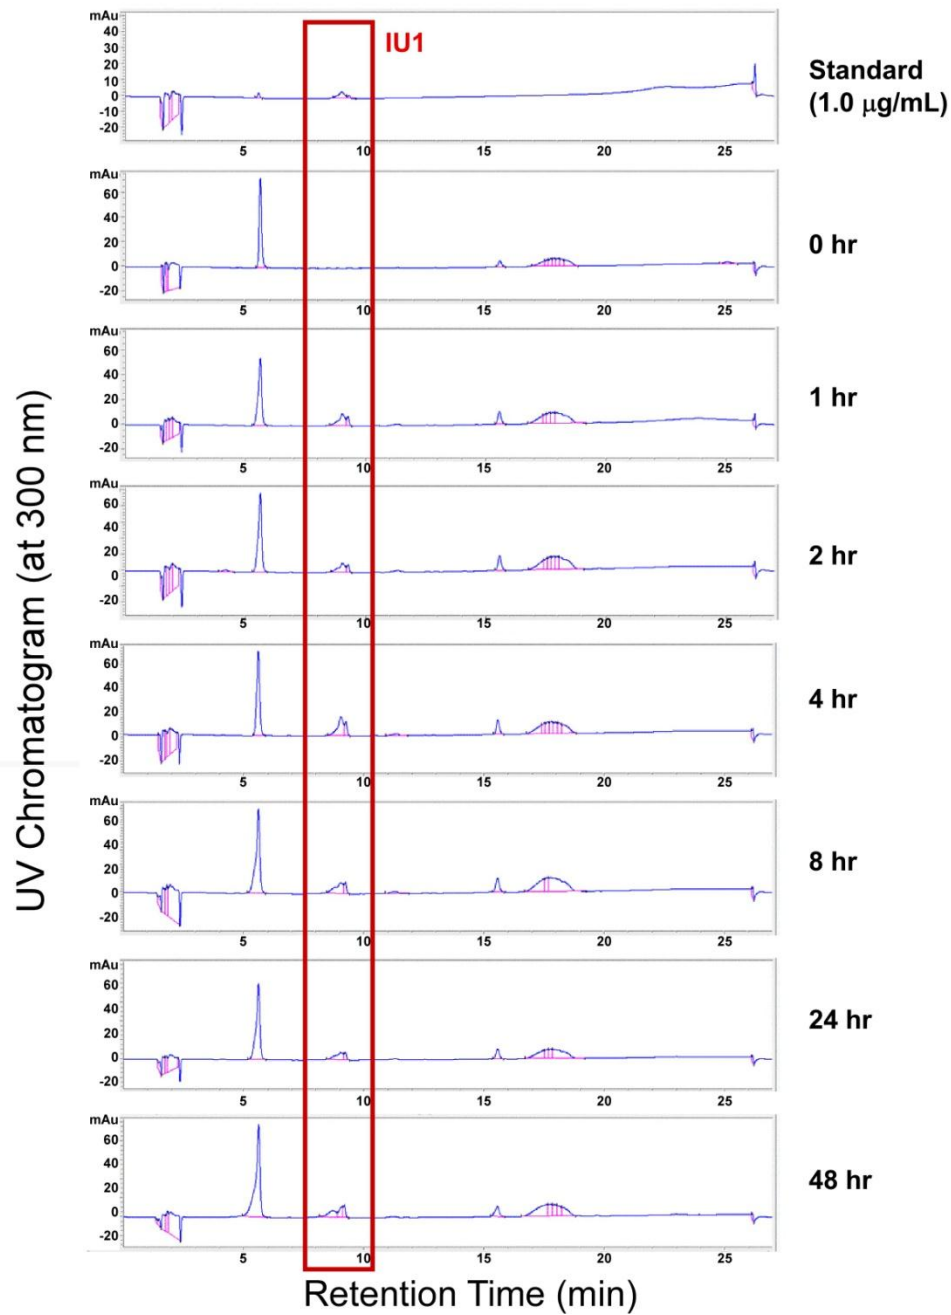

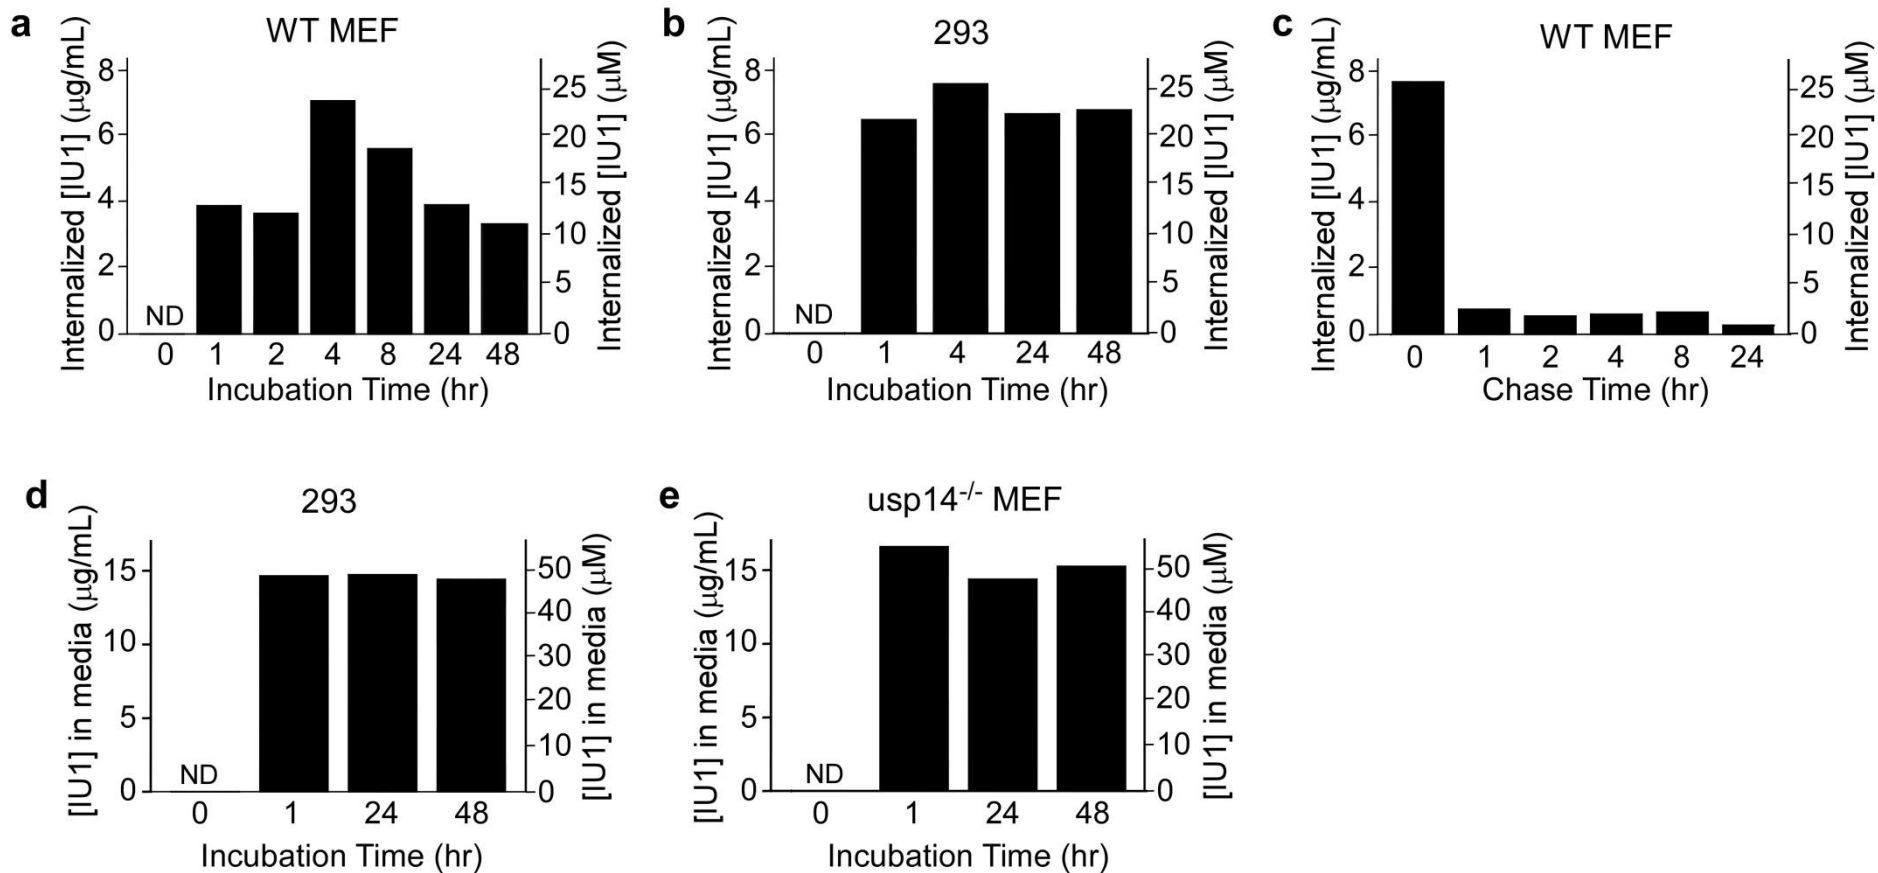

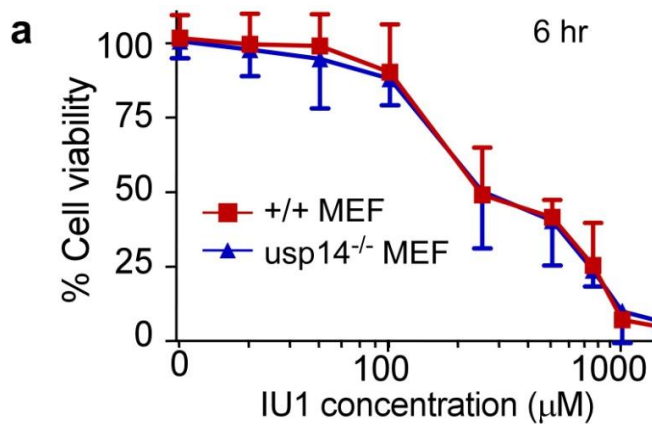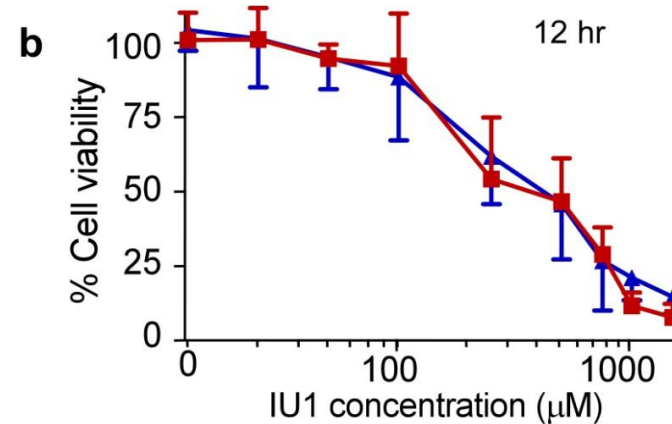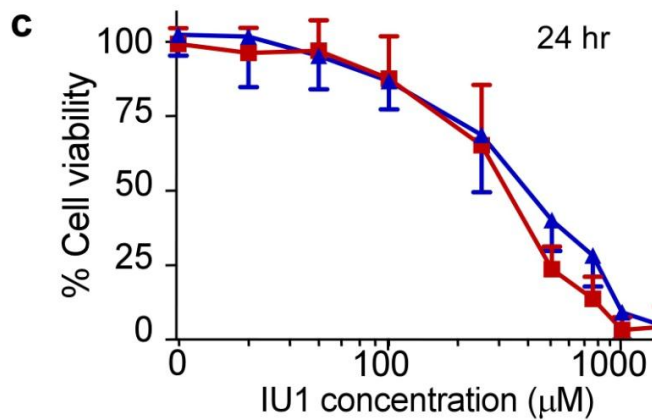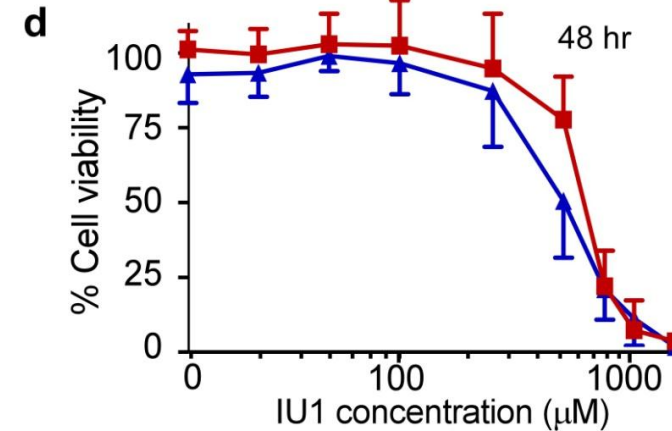

# Supplementary Fig. 21

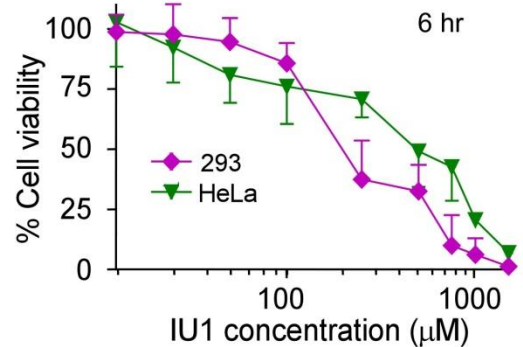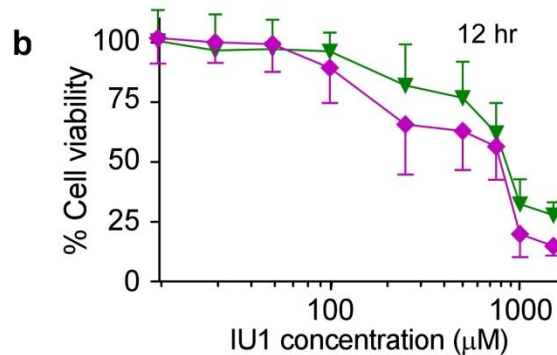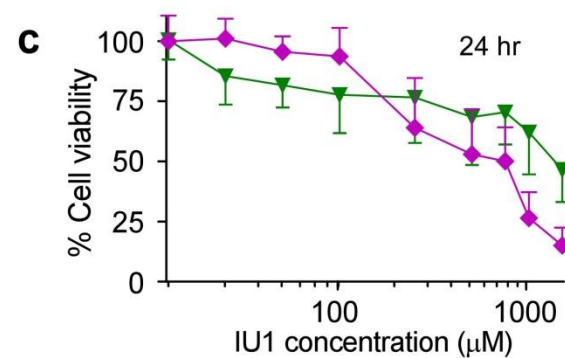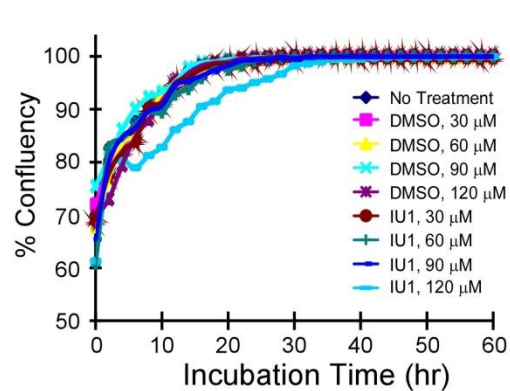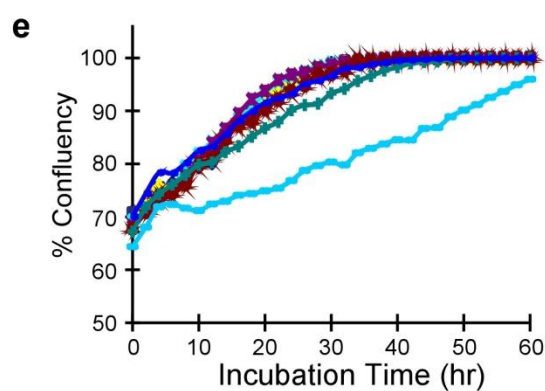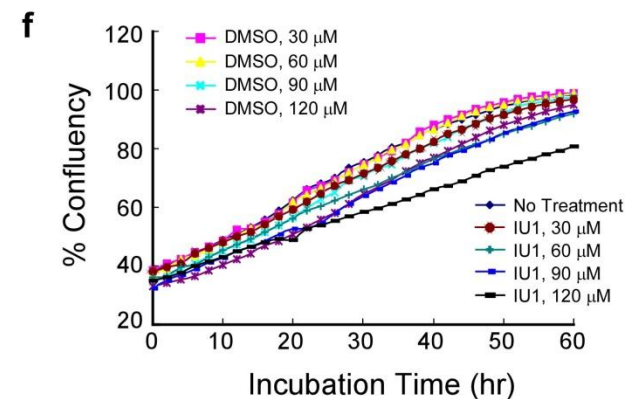

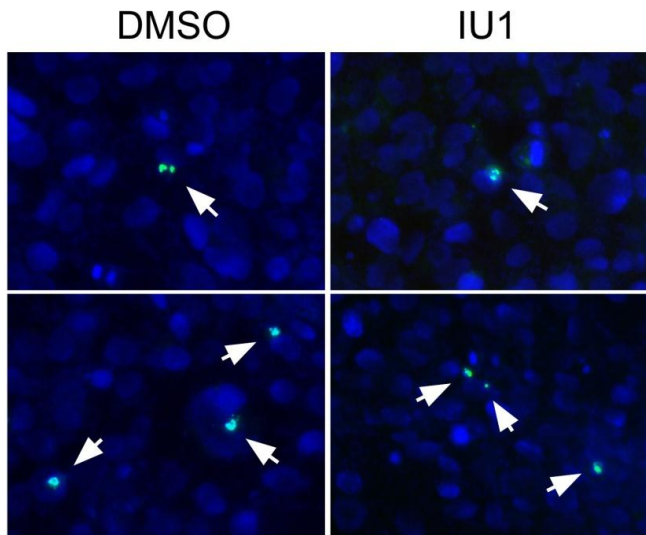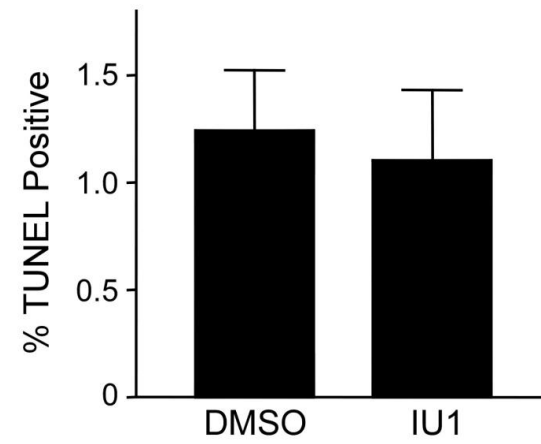

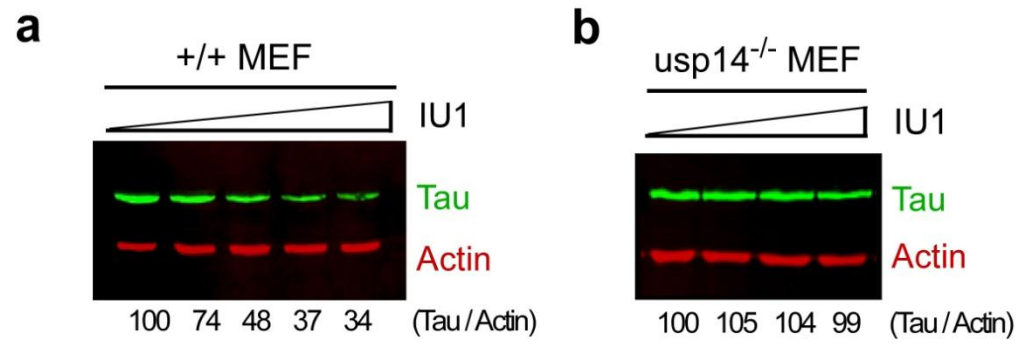



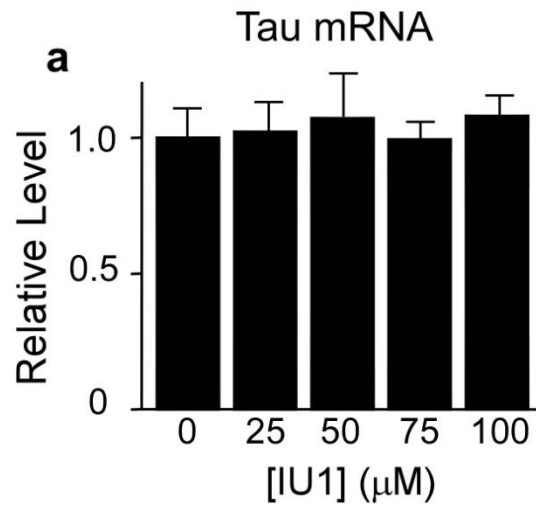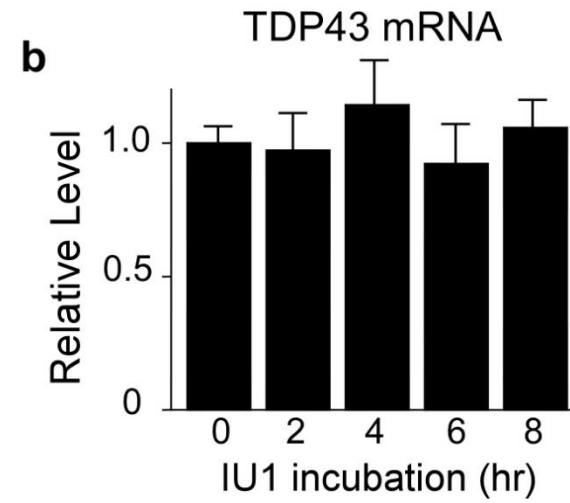

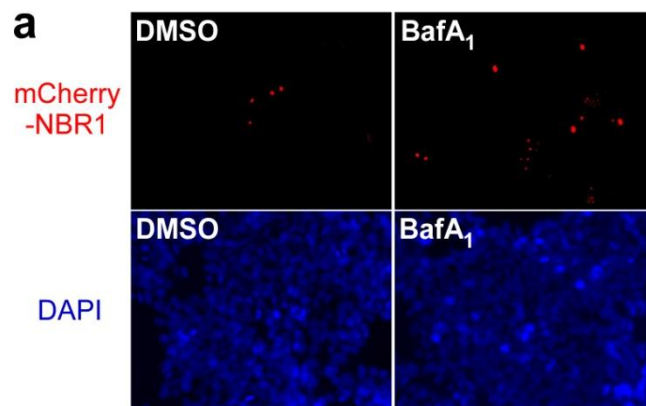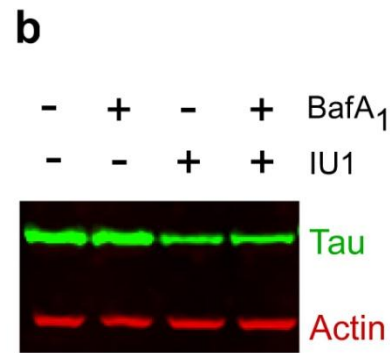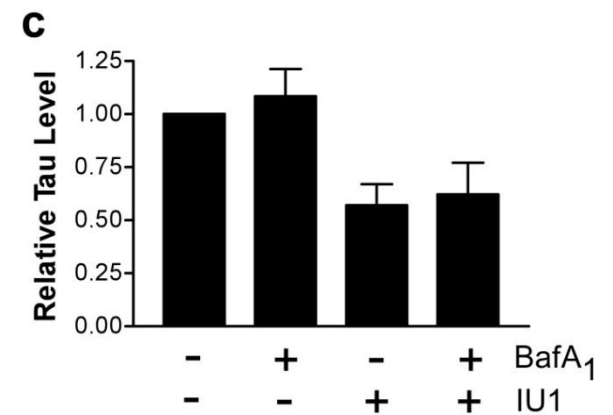

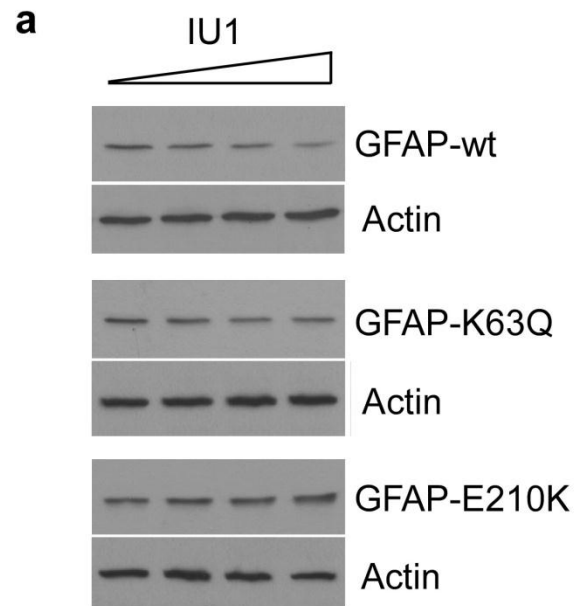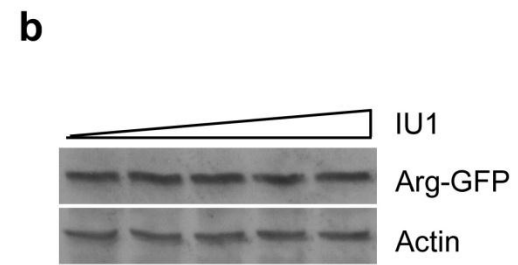

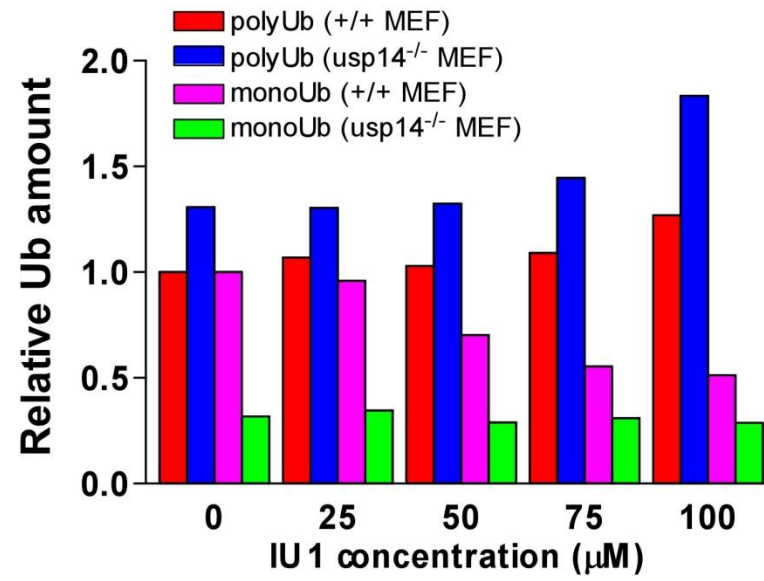

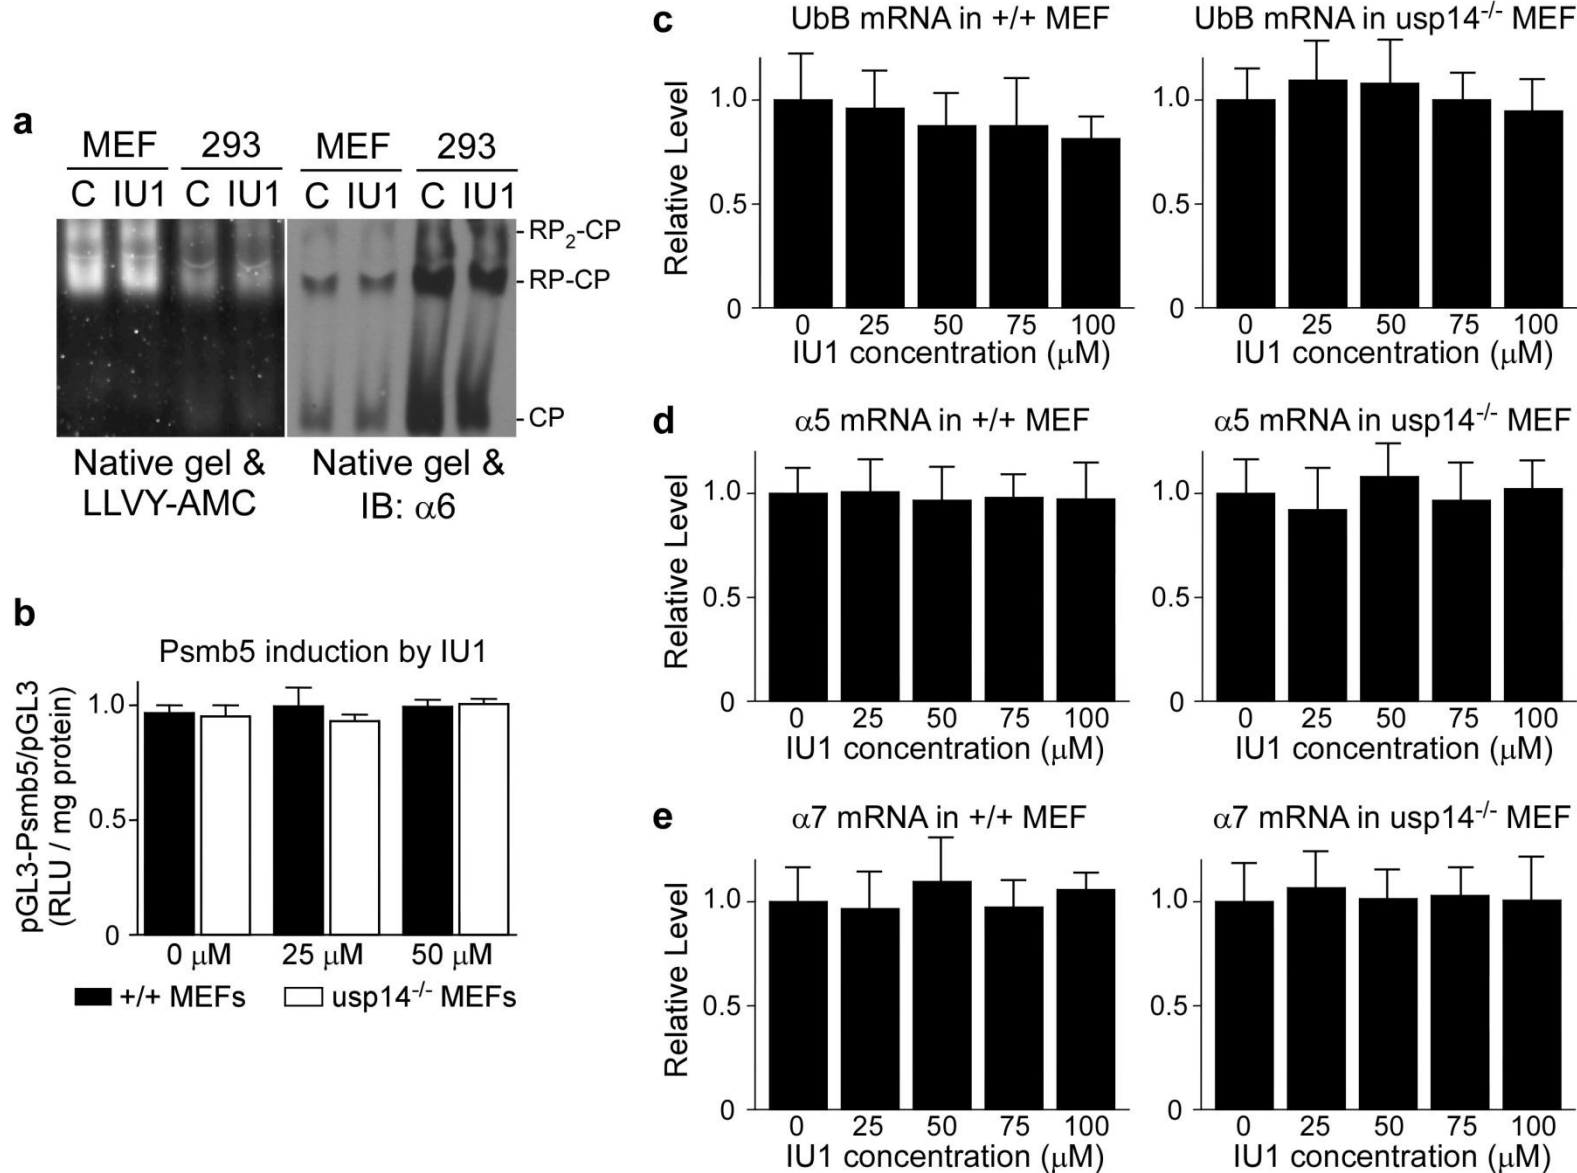

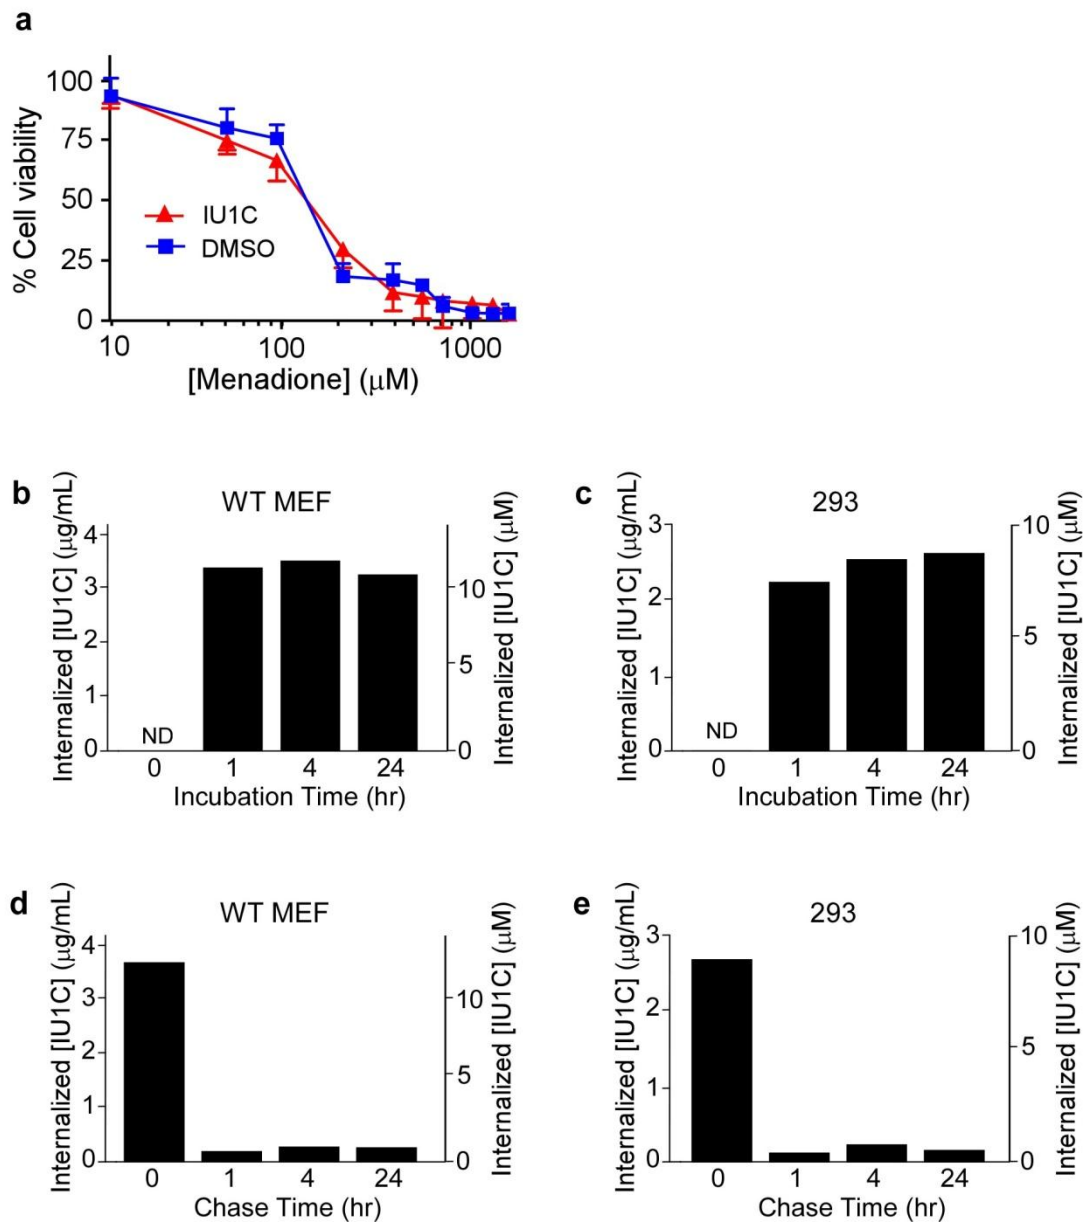

Supplement: NIHMS214959-supplement-2.pdf [file NIHMS214959-supplement-2.pdf]
